# Supplementary material
Source: MDPI journal article supplement (https://www.mdpi.com/1424-2818/15/1/43)
Supplement: s1 [file s1]

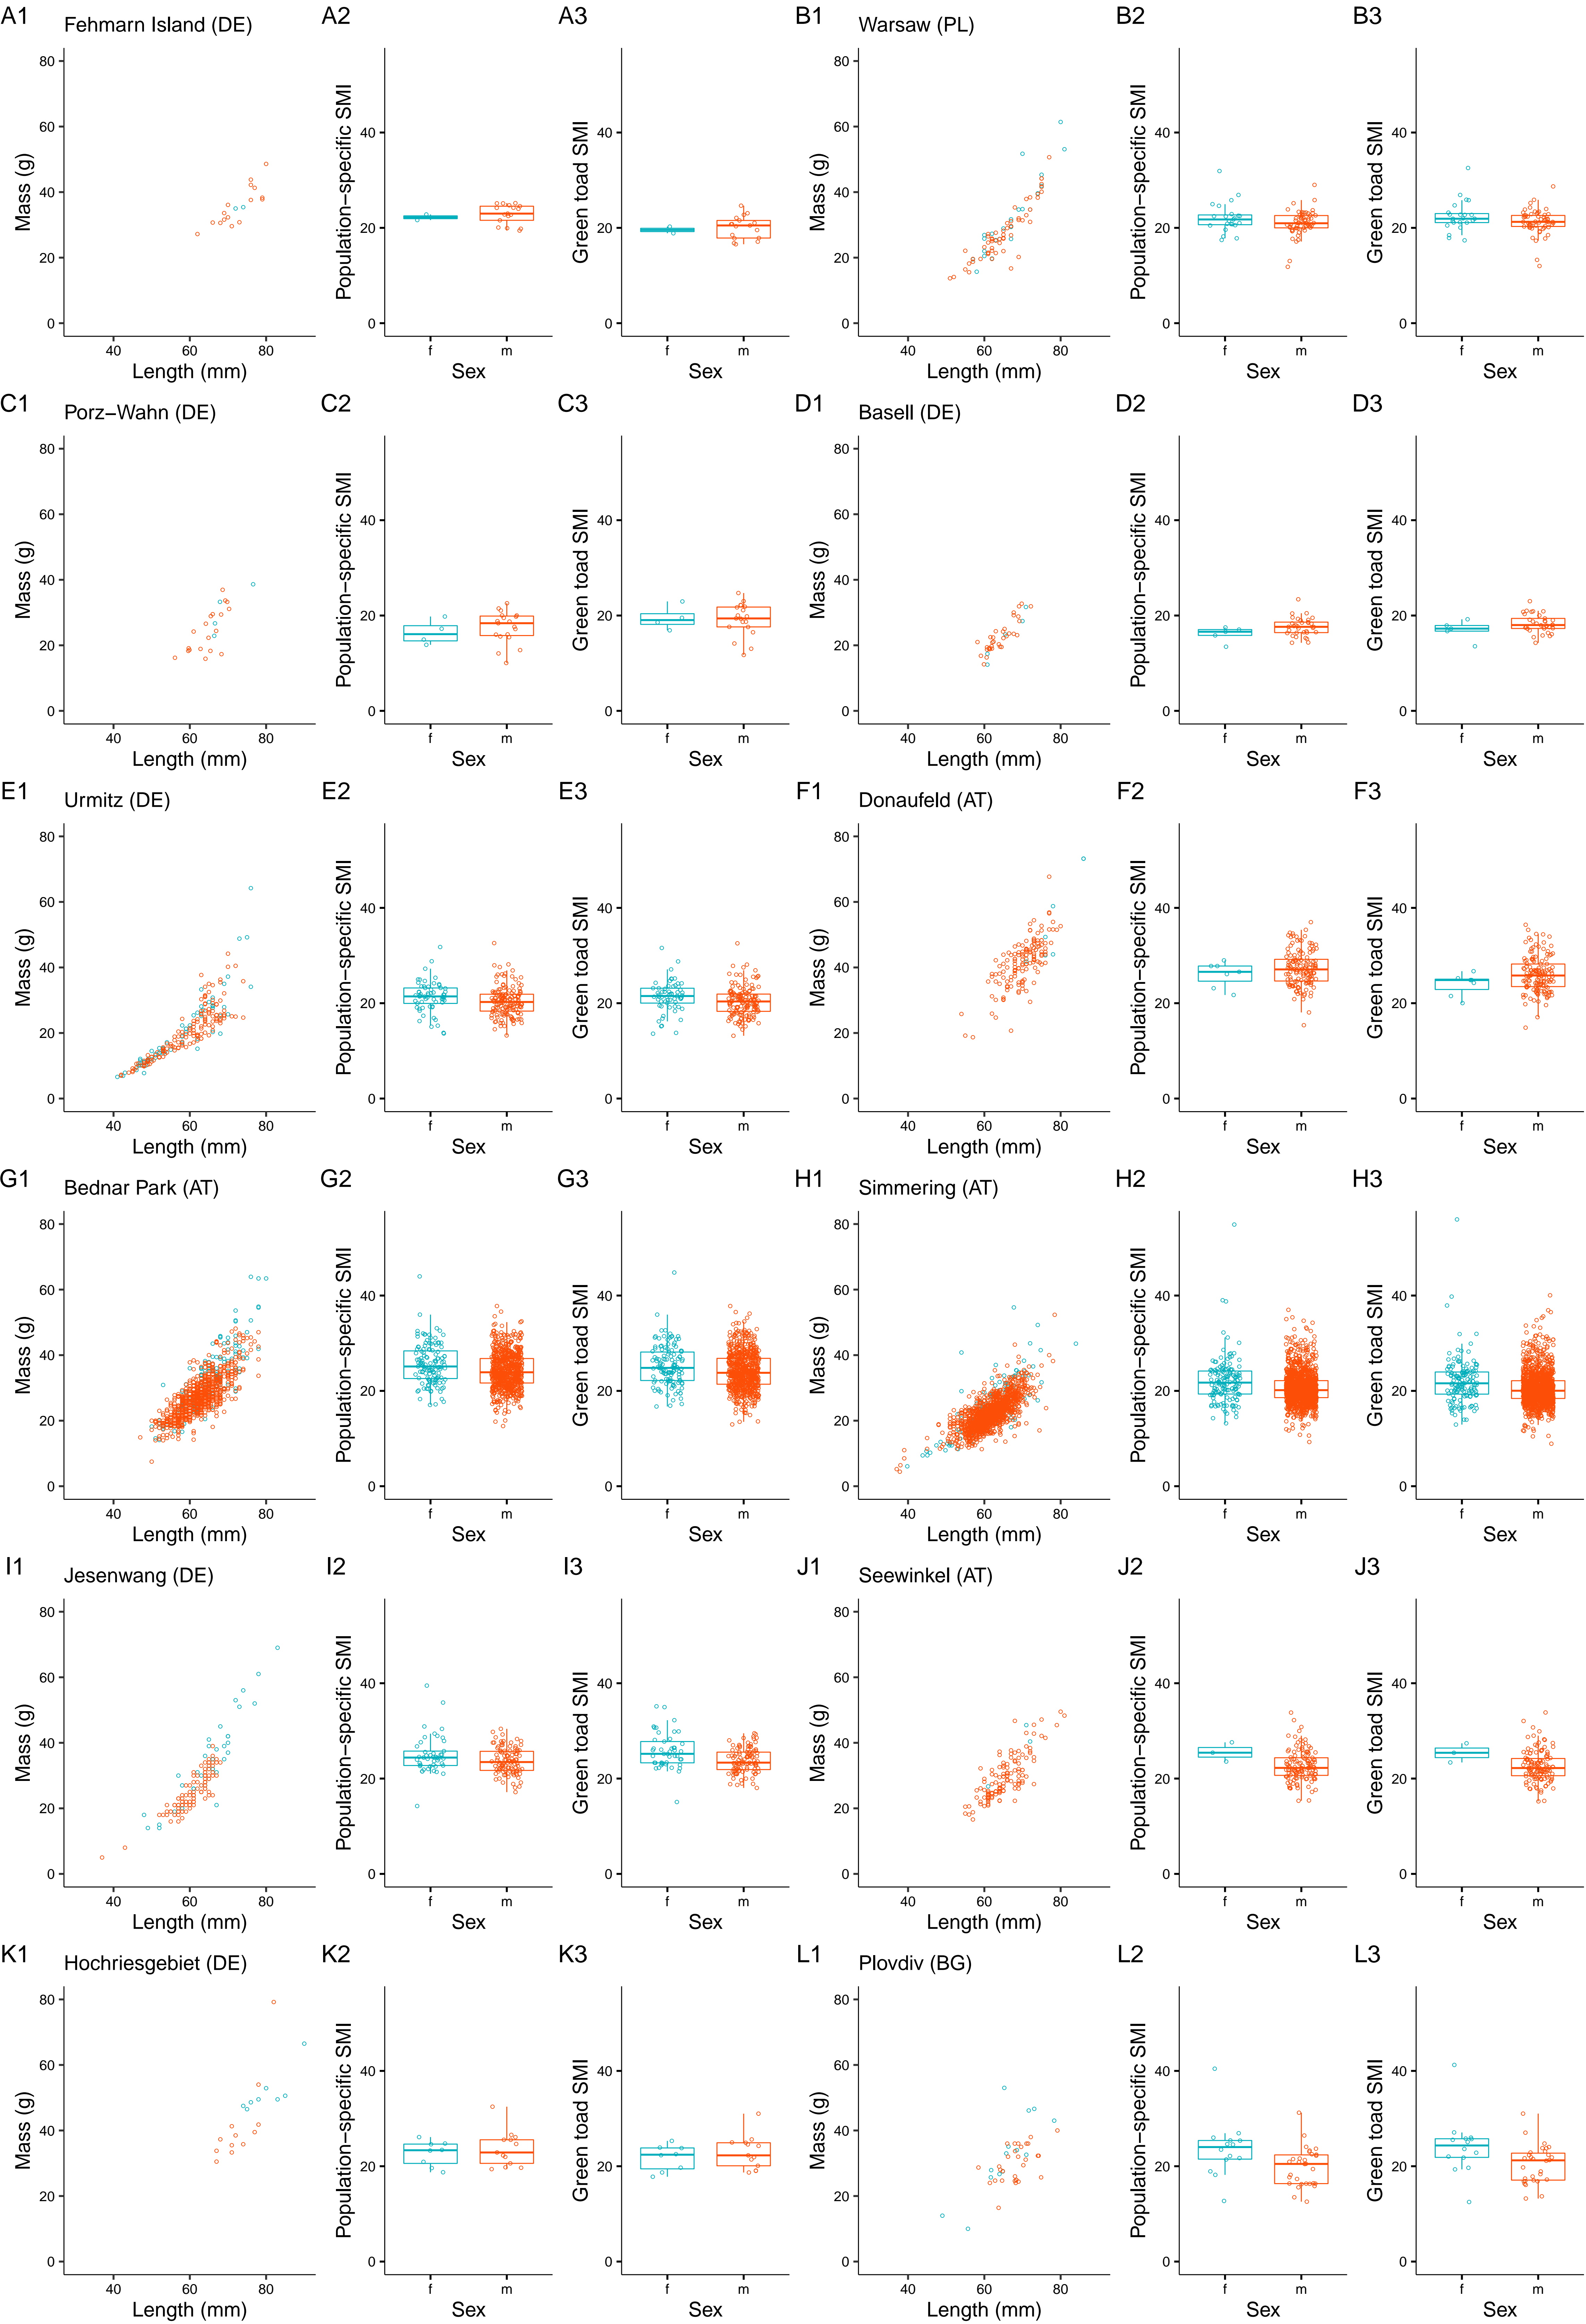

Supplementary Figure: Mass versus lengths of toads (1) as well as the scaled mass index using the population specific coefficient (2) and the green toad coefficient (3) of the populations in Fehmarn Island (A), Warsaw (B) Porz-Wahn (C), Basell (D), Urmitz (E), Donaufeld (F), Bednar Park (G), Simmering (H), Jesenwang (I), Seewinkel (J), Hochriesgebiet (K), Plovdiv (L).
